# Supplementary material for: Non-linear archetypal analysis of single-cell RNA-seq data by deep autoencoders
Source: PLoS Comput Biol. 2022 Apr 1;18(4):e1010025. doi: 10.1371/journal.pcbi.1010025 (PMC9007392; doi:10.1371/journal.pcbi.1010025)
Supplement: S11 Table — (XLSX) [file pcbi.1010025.s037.xlsx]

## Sheet: Sheet1
gene	coef.est	p.val	z.score	p.val.adj
PLA2G2A	5.09886	0	94.9808	0
MFAP5	5.37443	0	77.3697	0
IGFBP6	3.70336	0	76.9415	0
SLPI	5.75703	0	67.9085	0
CFD	2.56202	0	60.7213	0
APOD	2.93043	0	60.3912	0
GSN	2.67903	0	58.3304	0
CCDC80	2.32885	0	53.5972	0
PI16	5.65772	0	52.9545	0
MARCH3	2.75047	0	47.7145	0
HAS1	3.55361	0	47.3067	0
CLU	2.15822	0	46.9009	0
EBF1	2.49643	0	45.8952	0
EXOSC7	2.78552	0	45.6152	0
IGF2	3.33299	0	44.0345	0
CXCL14	2.77513	0	44.0328	0
CYP4Z2P	3.83324	0	43.4171	0
PDZRN4	4.53207	0	42.855	0
SFRP4	2.12574	0	41.708	0
MT1A	2.16064	0	41.6458	0
WISP2	2.83951	0	41.0961	0
GPRC5A	2.14723	0	40.5692	0
ACKR3	3.40193	0	38.3923	0
ABTB2	2.29007	0	38.2239	0
NLGN1	2.91945	0	38.1286	0
GALNT15	3.54843	0	37.8228	0
SFRP1	3.86982	9.63496e-284	35.9961	1.35082e-280
MT1G	2.443	5.97586e-277	35.5593	8.37815e-274
F3	2.13239	6.9038e-270	35.0993	9.67912e-267
IGFBP5	1.62132	2.08549e-267	34.9364	2.92386e-264
PTX3	2.06396	2.50464e-267	34.9311	3.5115e-264
SPACA6	2.85894	1.46099e-253	34.0124	2.04831e-250
ADAMTSL1	2.20396	2.9192e-253	33.9921	4.09273e-250
H19	2.58638	4.88013e-247	33.5682	6.84194e-244
LEPR	2.16668	2.69063e-245	33.4487	3.77226e-242
GPX3	1.56536	1.5861e-244	33.3956	2.22371e-241
UGDH	1.78818	1.3655e-242	33.2621	1.91443e-239
MT1M	1.52932	1.11168e-235	32.7806	1.55857e-232
TEX26-AS1	2.1182	2.67733e-235	32.7538	3.75361e-232
MYOC	5.69174	9.19386e-219	31.5711	1.28898e-215
CNTN4	2.2776	2.3032e-210	30.9532	3.22909e-207
IFI27	2.06753	5.48226e-205	30.551	7.68613e-202
EBF2	3.67272	6.19857e-202	30.3203	8.6904e-199
SFRP2	1.27438	6.9531e-188	29.2351	9.74825e-185
HTRA3	1.65118	1.56641e-183	28.8906	2.19611e-180
ADAMTS5	3.5086	5.03787e-183	28.8502	7.06309e-180
ADM	1.65531	8.75021e-161	27.0194	1.22678e-157
PLAT	1.70698	1.72947e-160	26.9942	2.42472e-157
ENSG00000261130	1.69833	2.76891e-154	26.4604	3.88201e-151
PLIN2	1.53477	1.12491e-147	25.8798	1.57712e-144
CXCL2	1.45901	1.01841e-142	25.4356	1.42781e-139
CYP4B1	3.3172	6.59593e-141	25.2714	9.2475e-138
GREB1L	2.39831	5.30567e-139	25.0974	7.43856e-136
FLNB	1.98007	1.02769e-138	25.0711	1.44082e-135
ZNF385B	2.51079	3.05315e-137	24.9357	4.28052e-134
CREB5	1.31533	7.98383e-137	24.8972	1.11933e-133
AKR1C1	1.6209	5.29903e-133	24.5417	7.42924e-130
GREB1	1.93879	9.59574e-132	24.4236	1.34532e-128
SAA1	2.13011	2.71485e-131	24.3811	3.80623e-128
EYA2	1.9111	3.16492e-129	24.1855	4.43722e-126
SLC16A7	1.61191	2.70254e-126	23.9052	3.78897e-123
PCSK6	2.62962	7.0234e-124	23.6719	9.84681e-121
ENSG00000273259	1.24576	1.24039e-122	23.5505	1.73902e-119
HP	3.60212	2.96548e-122	23.5135	4.1576e-119
EPB41L3	1.47008	5.42684e-122	23.4879	7.60843e-119
PCSK5	1.20487	1.10346e-120	23.3595	1.54704e-117
LINC02147	2.55409	1.41808e-119	23.2501	1.98815e-116
NGF-AS1	2.87225	8.85199e-117	22.9722	1.24105e-113
CXCL8	1.38055	1.57292e-111	22.4408	2.20523e-108
AKR1C2	1.5322	3.05072e-111	22.4113	4.2771e-108
ADAMTSL3	1.72212	1.54954e-108	22.1322	2.17246e-105
CACNB4	1.78784	3.51425e-105	21.781	4.92698e-102
IL6	1.2666	2.28917e-97	20.9405	3.20942e-94
MT1X	0.87832	3.03202e-97	20.9271	4.2509e-94
ALDH1A2	1.85815	1.31124e-93	20.5241	1.83835e-90
ANKFN1	2.15406	4.63049e-92	20.3501	6.49195e-89
ENSG00000248636	2.30317	1.3745e-91	20.2967	1.92705e-88
THBD	2.18608	2.89098e-91	20.2601	4.05315e-88
ENSG00000230258	4.6684	4.09214e-90	20.1292	5.73719e-87
PLPP3	1.06869	9.11144e-90	20.0895	1.27742e-86
SAA2-SAA4	2.5135	5.52671e-85	19.5351	7.74844e-82
SERPINE2	1.20932	1.15293e-83	19.3794	1.61641e-80
CSF3	2.32567	1.46048e-78	18.765	2.04759e-75
ST3GAL5	1.52424	1.59951e-78	18.7601	2.24252e-75
ABCA1	0.946604	9.65218e-78	18.6644	1.35324e-74
CXCL1	1.40121	8.59892e-77	18.5472	1.20557e-73
TNFAIP2	1.33266	1.19872e-76	18.5293	1.68061e-73
GPRC5D-AS1	1.40681	1.23875e-74	18.278	1.73673e-71
HMOX1	1.22911	6.03576e-73	18.0648	8.46213e-70
ENSG00000283228	1.61608	1.72214e-71	17.8789	2.41444e-68
KLHL29	1.08549	1.03717e-67	17.3869	1.45411e-64
TMTC1	1.22044	5.85253e-64	16.8845	8.20525e-61
ENSG00000263574	1.82752	2.2537e-63	16.8047	3.15969e-60
PHLDB2	0.959981	9.10694e-63	16.7217	1.27679e-59
TIAM1	1.12924	5.68977e-62	16.6122	7.97705e-59
NOX4	1.34408	5.4317e-61	16.4763	7.61525e-58
CLSTN2	1.67461	1.8384e-58	16.1203	2.57744e-55
MLXIPL	3.2324	3.72982e-58	16.0765	5.2292e-55
CCDC69	1.80497	4.3155e-58	16.0674	6.05032e-55
DKK1	1.6557	6.10989e-58	16.0459	8.56607e-55
UGP2	0.873201	1.88544e-57	15.9758	2.64339e-54
STEAP4	1.96499	7.62669e-55	15.597	1.06926e-51
LONRF3	1.30098	4.3039e-54	15.4861	6.03406e-51
FNIP2	0.967109	5.22185e-54	15.4737	7.32104e-51
FABP3	1.75784	1.15581e-53	15.4225	1.62045e-50
ALKAL2	1.71783	6.06302e-53	15.3151	8.50035e-50
ALCAM	1.03412	2.18001e-52	15.2317	3.05638e-49
ATP13A3	0.774762	3.79687e-51	15.0437	5.32321e-48
CDK19	0.708047	3.15685e-49	14.7483	4.4259e-46
DEFB1	3.23617	3.22671e-49	14.7468	4.52385e-46
GLP2R	2.56539	1.35445e-48	14.6496	1.89894e-45
SORBS1	0.835902	8.19645e-48	14.5268	1.14914e-44
CYP4X1	3.66812	1.07976e-47	14.5079	1.51382e-44
ENSG00000243696	3.22186	1.43107e-47	14.4886	2.00636e-44
XYLT1	0.800152	8.19316e-47	14.3682	1.14868e-43
CILP	1.31298	1.86134e-46	14.3113	2.60959e-43
PITPNC1	0.767828	9.31738e-46	14.1988	1.3063e-42
WNT9A	1.61419	5.19379e-45	14.0779	7.2817e-42
ENSG00000280241	1.42166	5.20935e-44	13.914	7.30351e-41
CFAP161	1.57027	6.30885e-41	13.3968	8.84501e-38
ENSG00000228436	1.19704	1.62627e-39	13.1534	2.28002e-36
COL4A4	1.40513	1.05411e-38	13.0114	1.47786e-35
CYP1B1	0.670647	7.86132e-38	12.857	1.10216e-34
ENSG00000258137	0.712284	8.89295e-38	12.8474	1.24679e-34
TFPI2	1.38023	1.39582e-37	12.8125	1.95694e-34
CRYAB	0.708911	4.80446e-36	12.535	6.73585e-33
ZRANB2-AS2	1.01625	2.73284e-35	12.3964	3.83144e-32
KCNB2	1.80845	1.58055e-34	12.2549	2.21593e-31
SEMA4A	0.885795	2.38517e-34	12.2215	3.34401e-31
MT1JP	1.38395	2.64045e-34	12.2133	3.70191e-31
KCND2	1.08691	1.6241e-33	12.0646	2.27699e-30
KIF21A	1.27575	3.62189e-33	11.9984	5.07789e-30
CXCL3	0.896646	7.12042e-33	11.9423	9.98283e-30
ARC	1.18134	7.79453e-33	11.9348	1.09279e-29
SERPINB2	1.28323	6.25192e-30	11.3649	8.76519e-27
ENSG00000258399	0.727298	9.13287e-30	11.3318	1.28043e-26
ENSG00000259616	2.40183	1.32589e-29	11.2991	1.8589e-26
LETM2	1.34192	4.66472e-27	10.7721	6.53994e-24
DNER	1.48288	3.64296e-26	10.5812	5.10743e-23
PDGFD	0.804648	1.81075e-25	10.4299	2.53868e-22
RETREG1	1.11705	2.39549e-25	10.4033	3.35848e-22
VEPH1	1.41475	3.18011e-25	10.3763	4.45851e-22
LINC02511	1.52719	3.75643e-25	10.3603	5.26651e-22
MEG8	0.703141	6.20855e-25	10.3122	8.70438e-22
MIR4713HG	0.908944	1.97839e-24	10.2002	2.7737e-21
ADAMTS4	0.821415	4.32092e-24	10.1241	6.05793e-21
LINC01697	1.26644	1.47604e-22	9.77261	2.06941e-19
PXDNL	1.26769	1.60874e-22	9.76388	2.25546e-19
SLC16A12	1.51505	2.16006e-22	9.73396	3.0284e-19
ENSG00000260971	0.677736	2.26296e-21	9.49216	3.17267e-18
ANGPTL4	0.541799	2.53366e-21	9.48038	3.55219e-18
HIF3A	0.642704	2.99003e-21	9.46308	4.19202e-18
BRINP3	1.10645	8.77392e-21	9.34989	1.2301e-17
ACSL4	0.524447	8.23284e-20	9.11007	1.15424e-16
CD177	3.34508	1.187e-19	9.07029	1.66417e-16
HELLPAR	0.950002	2.37447e-19	8.99444	3.32901e-16
HMCN2	0.758036	1.07972e-18	8.82653	1.51377e-15
SHISA6	0.946131	1.20474e-18	8.81426	1.68905e-15
GALNT13	0.912398	3.3174e-18	8.70005	4.65099e-15
GCH1	0.599064	5.77159e-18	8.63699	8.09177e-15
YPEL2	0.678288	1.71871e-17	8.51138	2.40963e-14
ADCY2	0.97795	2.72475e-17	8.4578	3.8201e-14
CCDC3	0.903017	6.34875e-17	8.35856	8.90094e-14
ACSM3	1.27798	1.10112e-16	8.29334	1.54377e-13
LINC02456	0.653729	2.47245e-16	8.19662	3.46637e-13
KHDRBS3	0.692116	2.64122e-16	8.18867	3.70299e-13
TGFB2	0.724229	3.79367e-16	8.14497	5.31872e-13
COL4A3	1.065	1.58257e-15	7.97033	2.21877e-12
NCALD	0.52383	2.42815e-15	7.91725	3.40426e-12
ENSG00000226445	0.831916	2.97294e-15	7.89204	4.16806e-12
ENSG00000256513	7.14147	9.12611e-15	7.75088	1.27948e-11
TNS4	1.03888	1.04154e-14	7.73408	1.46024e-11
SLC25A44	0.761199	1.45486e-14	7.69144	2.03971e-11
HHIP	2.11298	2.11273e-14	7.64357	2.96205e-11
NAV2	0.391495	2.57755e-14	7.61794	3.61372e-11
ALPL	0.975624	4.12877e-14	7.55687	5.78854e-11
CRIP1P4	0.885461	5.57015e-14	7.51781	7.80934e-11
TAF4B	0.613044	7.22774e-14	7.48367	1.01333e-10
PDE10A	0.625446	9.06321e-14	7.45388	1.27066e-10
ENSG00000284747	0.804792	1.55984e-13	7.38195	2.18689e-10
PI3	2.4798	2.09046e-13	7.34288	2.93083e-10
FGF2	0.512335	2.40155e-13	7.3243	3.36697e-10
WTAP	0.403986	6.94171e-13	7.18058	9.73228e-10
TRH	2.04809	1.31681e-12	7.09253	1.84617e-09
KLRD1	0.805093	3.98955e-12	6.93755	5.59336e-09
ADAP1	0.973606	7.39453e-12	6.84982	1.03671e-08
PLEKHG2	0.488555	1.29228e-11	6.7695	1.81177e-08
FST	0.726844	2.65336e-11	6.66463	3.72002e-08
MAP1LC3C	1.44118	7.00813e-11	6.52048	9.82539e-08
JARID2	0.38005	1.04257e-10	6.46065	1.46168e-07
SPRR2F	5.27136	7.08418e-10	6.1642	9.93202e-07
MYO1E	0.328924	1.41072e-09	6.05425	1.97783e-06
EGR3	0.551585	1.4152e-09	6.05374	1.98411e-06
GRB10	0.378053	2.67308e-09	5.95051	3.74765e-06
ENSG00000234290	0.542124	2.81176e-09	5.94223	3.94208e-06
SGMS2	0.499686	6.64096e-09	5.79976	9.31063e-06
ANXA8	1.75296	6.70679e-09	5.79811	9.40291e-06
TBX20	2.51586	7.65233e-09	5.77594	1.07286e-05
SH3BP5	0.556807	9.6993e-09	5.73591	1.35984e-05
FOS	0.242145	1.52116e-08	5.65916	2.13266e-05
PLCXD3	1.01254	1.64815e-08	5.64538	2.3107e-05
ENSG00000260911	1.01049	3.5204e-08	5.51336	4.93559e-05
KCNAB1	0.564225	6.30258e-08	5.41	8.83622e-05
SNTG1	0.624117	9.39044e-08	5.33814	0.000131654
KCNJ2	1.36741	1.12036e-07	5.30603	0.000157074
CYP4A11	4.07988	2.27177e-07	5.1756	0.000318503
NOV	0.693618	2.50295e-07	5.15748	0.000350914
ENSG00000249631	1.11835	3.89328e-07	5.0741	0.000545837
ENSG00000272482	2.40351	6.11041e-07	4.98769	0.00085668
SYNPO2	0.370615	6.3943e-07	4.97891	0.000896481
HEG1	0.307593	7.01208e-07	4.96103	0.000983094
PGAM1P5	0.789736	8.79397e-07	4.91687	0.00123291
CDC42EP4	0.354312	8.87635e-07	4.91504	0.00124446
ATP1B3	0.255581	1.01256e-06	4.88918	0.00141962
BMP6	0.731286	1.14319e-06	4.86524	0.00160276
CAMP	2.92039	1.25833e-06	4.84623	0.00176417
ENSG00000267737	0.589564	1.2812e-06	4.84265	0.00179624
ADGRE2	0.480154	2.01073e-06	4.75234	0.00281904
SCGB1A1	0.310402	2.0583e-06	4.74761	0.00288574
DLK1	2.4337	2.95366e-06	4.67402	0.00414103
ADGRG4	0.996179	5.62583e-06	4.53998	0.00788741
FHOD3	0.422393	7.08564e-06	4.4911	0.00993407
ENSG00000228113	1.02449	7.66969e-06	4.4742	0.0107529
PHF24	1.97407	7.85537e-06	4.46909	0.0110132
SULF1	0.241535	8.67595e-06	4.44779	0.0121637
TLL1	0.683657	1.04868e-05	4.40689	0.0147025
PTGS2	0.422937	1.07225e-05	4.40207	0.015033
ZC3HAV1	0.275877	1.10601e-05	4.39534	0.0155062
ENSG00000253295	0.561221	1.38546e-05	4.34615	0.0194242
ENSG00000262213	0.998682	1.73081e-05	4.29706	0.0242659
DUOX2	1.80831	1.8952e-05	4.27689	0.0265708
FLNC-AS1	0.715707	2.05588e-05	4.25873	0.0288235
LDHC	0.464937	2.20954e-05	4.24259	0.0309777
DNAJB1	0.223835	2.7378e-05	4.19425	0.0383839
